# Supplementary material for: Tissue-specific variation in DNA methylation levels along human chromosome 1
Source: PubMed Central journal article supplement (PMC2706828; doi:10.1186/1756-8935-2-7), 2009-06-08

Figure S5

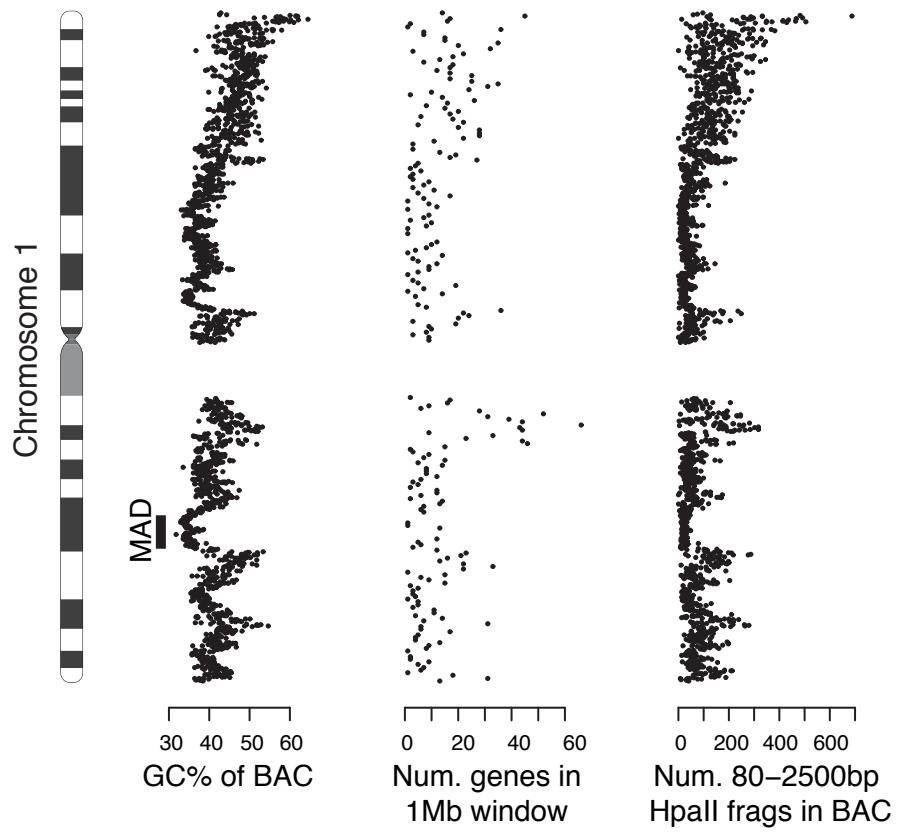

Supplement: 1756-8935-2-7-S6.pdf [file 1756-8935-2-7-S6.pdf]
