# Supplementary material for: Tissue-specific variation in DNA methylation levels along human chromosome 1
Source: PubMed Central journal article supplement (PMC2706828; doi:10.1186/1756-8935-2-7), 2009-06-08
Supplement: 1756-8935-2-7-S9.pdf [file 1756-8935-2-7-S9.pdf]

**Figure S8**

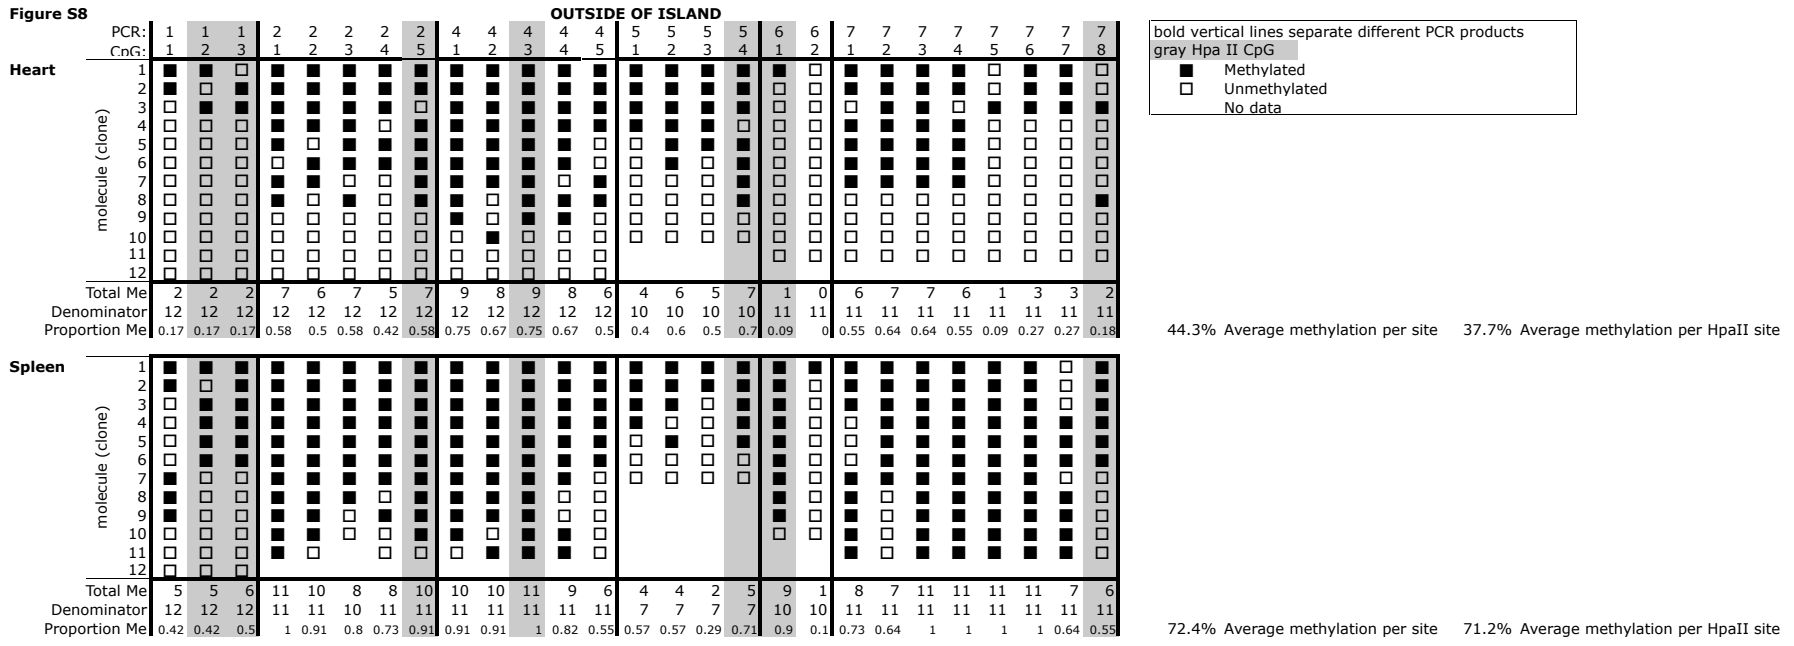

bold vertical lines separate different PCR products  
 gray Hpa II CpG  
 ■ Methylated  
 □ Unmethylated  
 No data

44.3% Average methylation per site    37.7% Average methylation per HpaII site

72.4% Average methylation per site    71.2% Average methylation per HpaII site

P1    6.9% Average methylation per site    8.1% Average methylation per HpaII site

P1    24.5% Average methylation per site    39.4% Average methylation per HpaII site

**Heart** P2:  
0 of 35 sites methylated in 32 clones

**Spleen** P2:  
2 of 35 sites methylated, in a total of 12 clones (methylated sites in separate clones)
